# Supplementary material
Source: PubMed Central journal article supplement (PMC2543049)

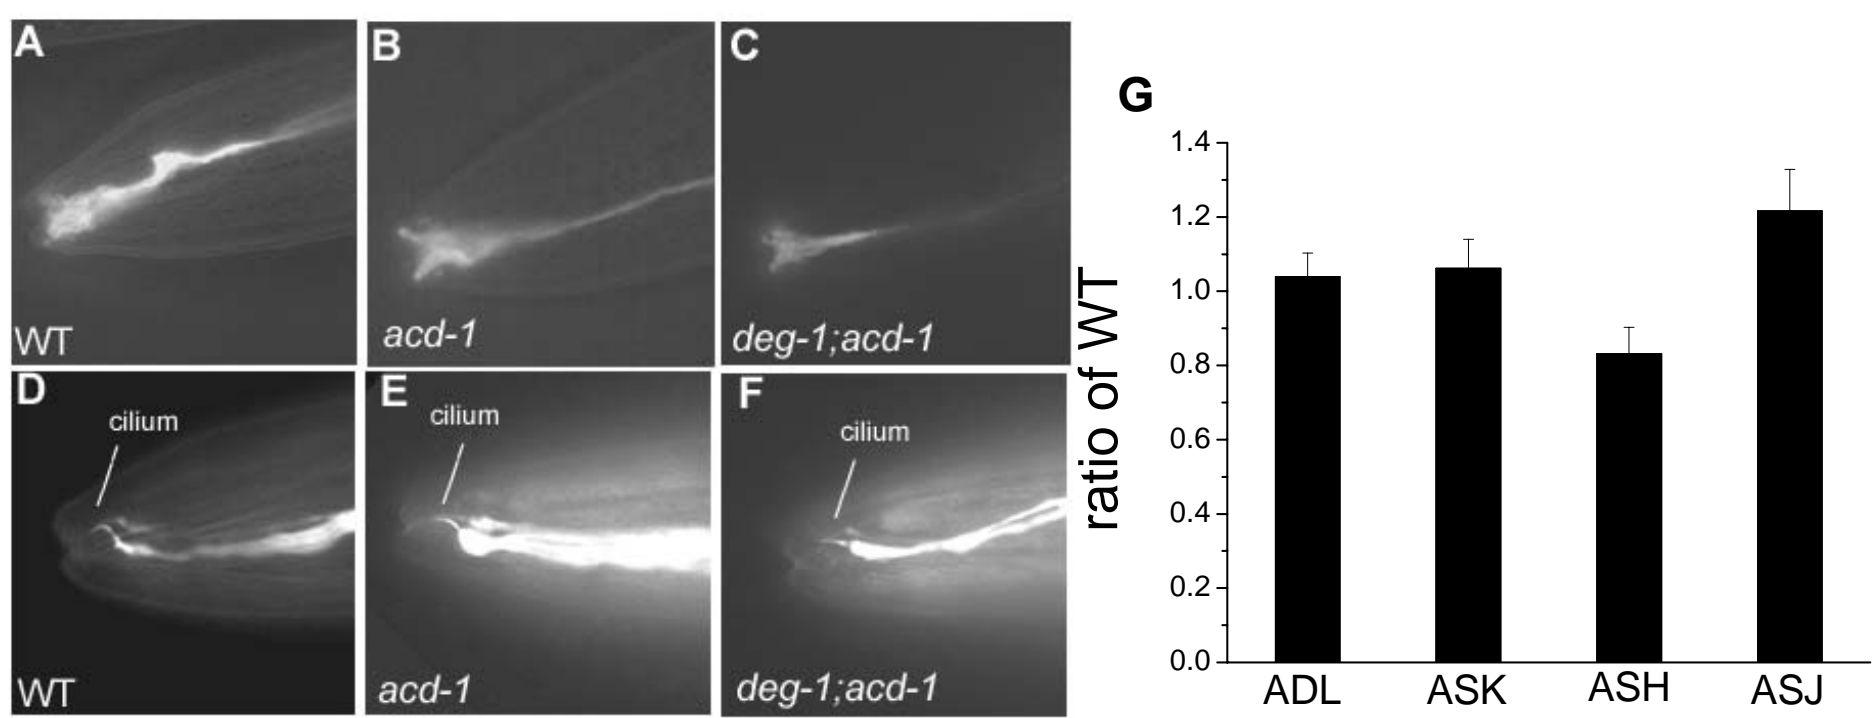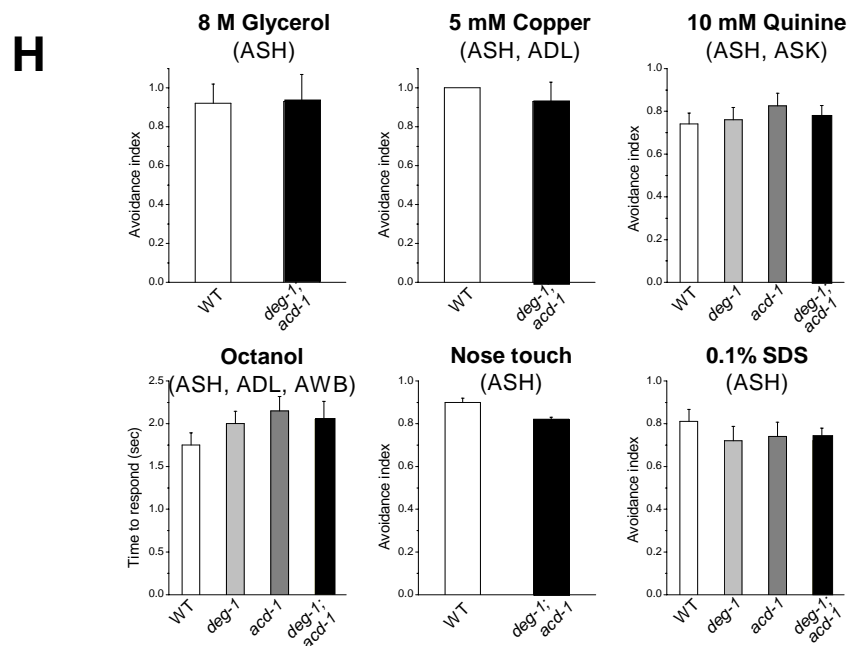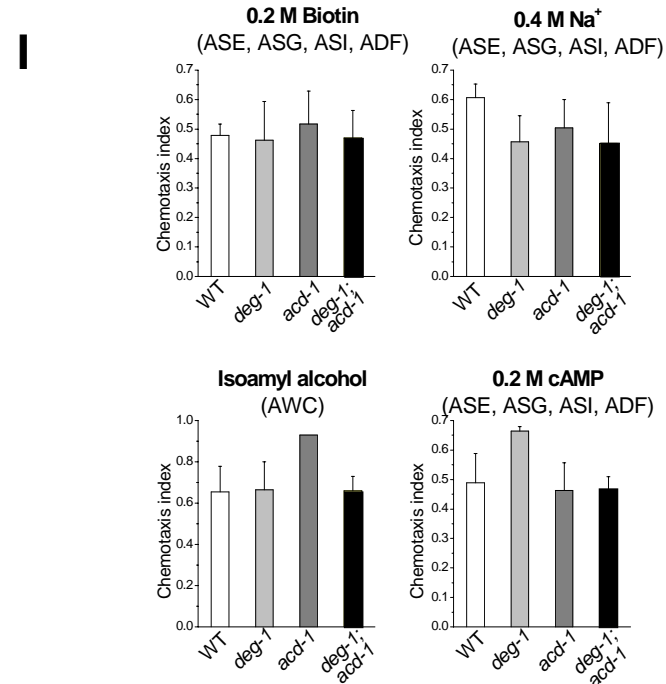

Supplement: emboj2008161s1.pdf [file emboj2008161s1.pdf]

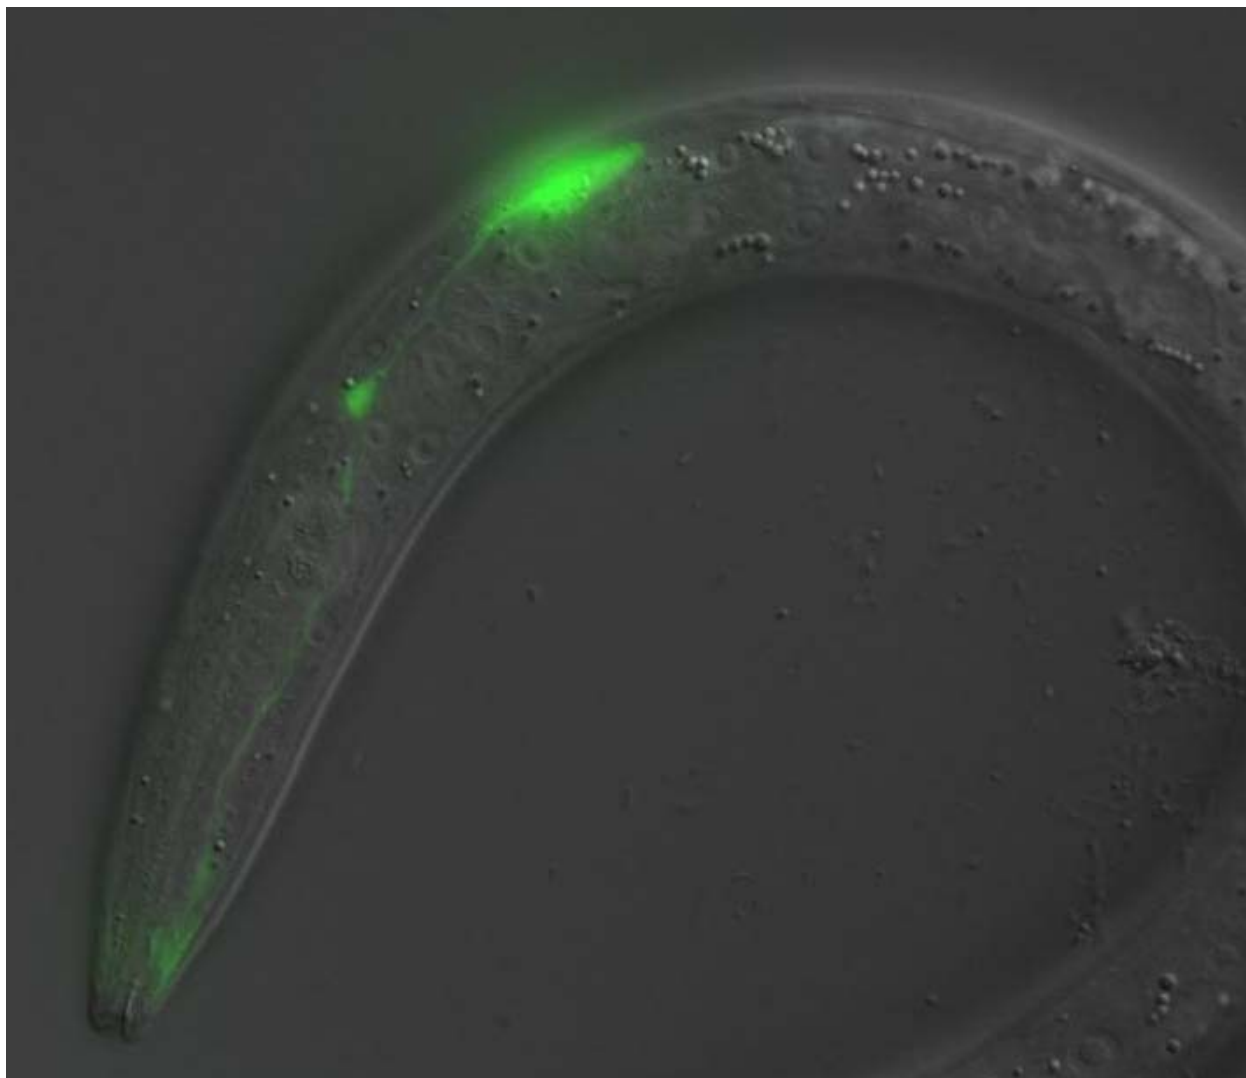

Supplementary Figure 2, Wang et al.

Supplement: emboj2008161s2.pdf [file emboj2008161s2.pdf]

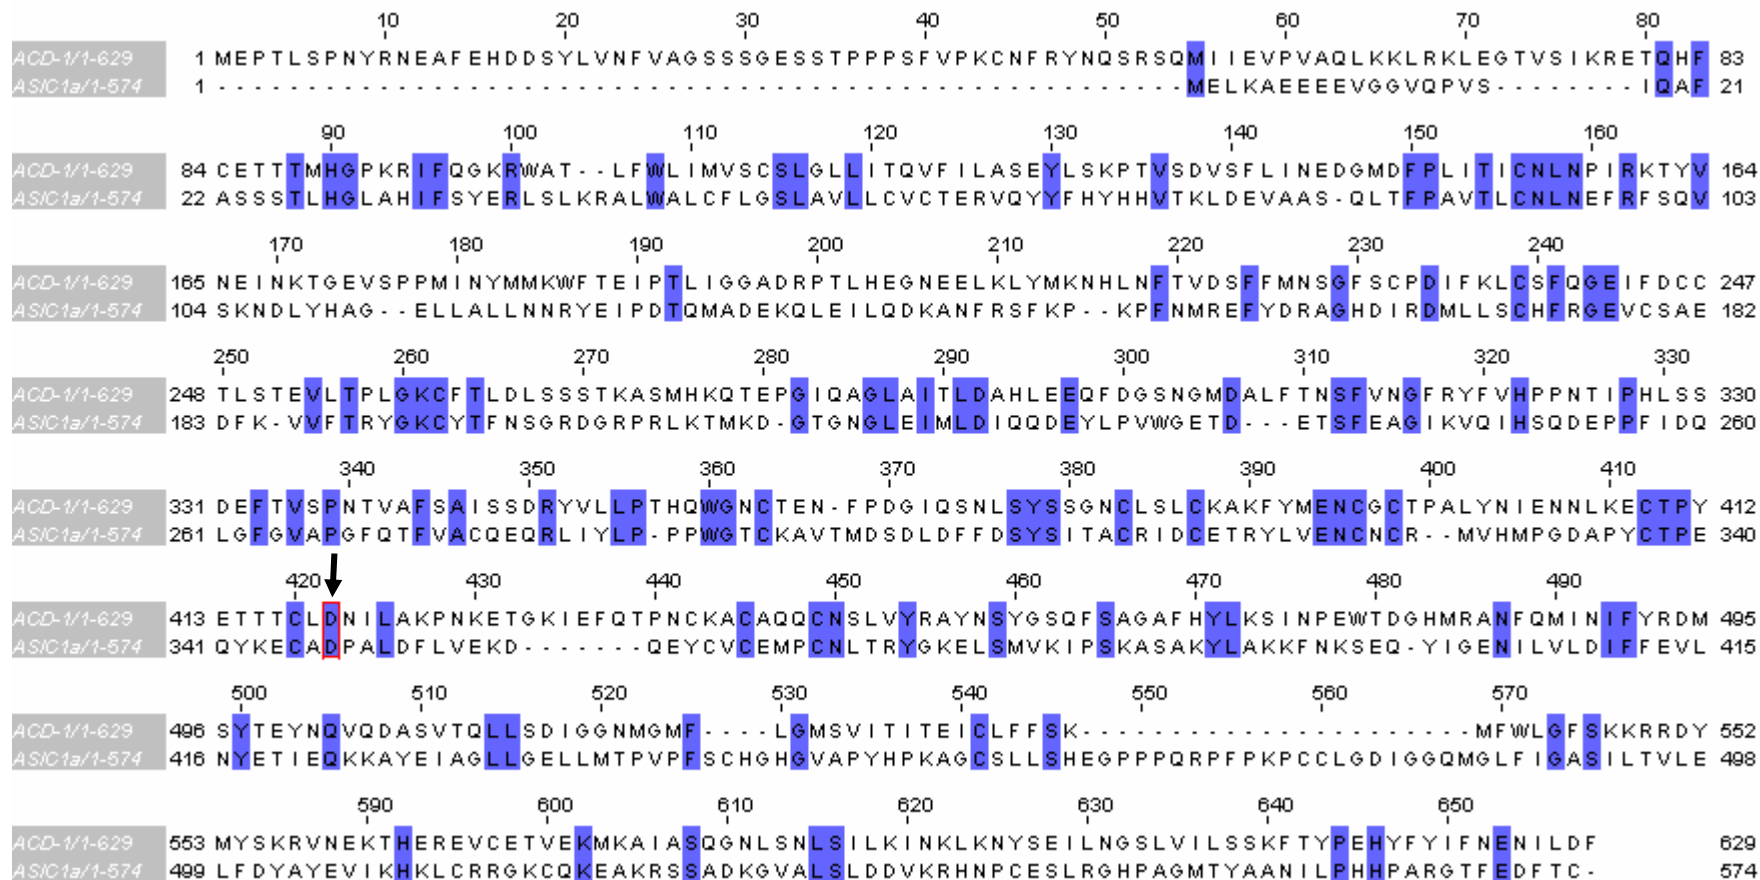

Supplementary Figure 3, Wang et al.

Supplement: emboj2008161s3.pdf [file emboj2008161s3.pdf]
